1 Non-antibiotic antimicrobial triclosan induces multiple antibiotic  
2 resistance through genetic mutation

3 *Ji Lu*<sup>†</sup>, *Min Jin*<sup>†</sup>, *Son Hoang Nguyen*<sup>‡</sup>, *Likai Mao*<sup>†</sup>, *Jie Li*<sup>†</sup>, *Lachlan J. M. Coin*<sup>‡</sup>, *Zhiguo Yuan*<sup>†</sup>,  
4 *Jianhua Guo*<sup>\*\*†</sup>

5 <sup>†</sup> Advanced Water Management Centre (AWMC), The University of Queensland, St Lucia,  
6 Brisbane, QLD, 4072, Australia

7 <sup>‡</sup> Institute for Molecular Bioscience, University of Queensland, St Lucia, Brisbane, Queensland  
8 4072 Australia

9 **Corresponding Author**

10 <sup>\*</sup>To whom correspondence should be addressed. Email: [j.guo@awmc.uq.edu.au](mailto:j.guo@awmc.uq.edu.au) (J. Guo).

11

12 ABSTRACT: Antibiotic resistance poses a major threat to public health. Overuse and misuse of  
13 antibiotics are generally recognised as the key factors contributing to antibiotic resistance.  
14 However, whether non-antibiotic, anti-microbial (NAAM) chemicals can directly induce antibiotic  
15 resistance is unclear. We aim to investigate whether the exposure to a NAAM chemical triclosan  
16 (TCS) has an impact on inducing antibiotic resistance on *Escherichia coli*. Here, we report that at  
17 a concentration of 0.2 mg/L TCS induces multi-drug resistance in wild-type *Escherichia coli* after  
18 30-day TCS exposure. The oxidative stress induced by TCS caused genetic mutations in genes  
19 such as *fabI*, *frdD*, *marR*, *acrR* and *soxR*, and subsequent up-regulation of the transcription of

20 genes encoding beta-lactamase and multi-drug efflux pump, together with down-regulation of  
21 genes related to membrane permeability. The findings advance our understanding of the potential  
22 role of NAAM chemicals in the dissemination of antibiotic resistance in microbes, and highlights  
23 the need for controlling biocide applications.

24

25

## 26 1. INTRODUCTION

27 The dissemination of antibiotic resistance has become a major threat to public health.<sup>1</sup> Worldwide,  
28 each year about 700,000 people die from antimicrobial-resistant infections, and this mortality has  
29 been projected to reach 10 million per annum by 2050.<sup>2</sup> The spread of antibiotic resistance has  
30 been attributed to the overuse and misuse of antibiotics in clinic settings, agriculture, and  
31 aquaculture.<sup>3</sup>

32 On a global scale, non-antibiotic, antimicrobial (NAAM) chemicals are used in much larger  
33 quantities than antibiotics, resulting in high residual levels of NAAM chemicals in the wider  
34 environment. For example, triclosan (TCS), a common biocidal agent used in over 2,000 kinds of  
35 products such as toothpaste and handwashing liquid,<sup>4</sup> is widely detected in aquatic environments  
36 at  $\mu\text{g/L}$ <sup>5</sup> to  $\text{mg/L}$  levels,<sup>6</sup> even up to 0.4  $\text{mg/L}$ ,<sup>7</sup> Evidence suggests there are potential links between  
37 NAAM chemicals and antibiotic resistance.<sup>8</sup> For instance, mupirocin-resistant<sup>9</sup> and quinolone-  
38 resistant<sup>10</sup> mutants were reported to exhibit decreased susceptibility to TCS, while TCS-resistant  
39 were found to have increased cross-resistance to ampicillin, ciprofloxacin<sup>11</sup> and erythromycin.<sup>12</sup>  
40 However, it remains unclear if NAAM chemicals such as TCS can directly induce antibiotic  
41 resistance. As a preventative policy, U.S. Food and Drug Administration (USFDA) has banned the  
42 addition of TCS to antibacterial soap.<sup>13</sup> However, the lack of unequivocal evidence for NAAM  
43 chemicals inducing antibiotic resistance has prevented such a policy being adopted in other  
44 countries.

45 Here, we investigated the potential of TCS to cause antibiotic resistance. Wild-type *Escherichia*  
46 *coli* was exposed to TCS ranging from a sub-minimum inhibitory concentration (0.02 and 0.2  
47  $\text{mg/L}$ , which are environmentally relevant concentrations) to near lethal concentration (2  $\text{mg/L}$ ,  
48 Figure. 1A). We found that after 30 days treatment, 0.2  $\text{mg/L}$  TCS increased the mutation

49 frequency for multiple antibiotic resistance bacteria and the resistances were heritable.  
50 Furthermore, we demonstrated that TCS at sub-MIC could induce mutation via increased Reactive  
51 Oxidative Species (ROS) generation and stress-induced mutagenesis (SIM). The subsequent  
52 mutations enhanced the expressions of beta-lactamase coding gene *ampC* and both local and global  
53 multidrug resistance regulator genes *acrAB*, *soxS* and *marAB* that initialized the translations of  
54 beta-lactamase AmpC and multidrug efflux pumps AcrAB-TolC. Together, TCS-induced  
55 mutations could induce resistance to antibiotics by increasing antibiotics efflux and antibiotic  
56 degradation.

57

## 58 **2. MATERIALS AND METHODS**

### 59 **Bacterial strains, triclosan, antibiotics**

60 *E. coli* K-12 was purchased from American Type Culture Collection (ATCC 700926). Triclosan  
61 was purchased from Sigma-Aldrich (USA). Antibiotics: amoxicillin (AMX), cephalexin (LEX),  
62 tetracycline (TET), chloramphenicol (CHL), levofloxacin (LVX), and norfloxacin (NOR) were  
63 supplied by Sigma-Aldrich (USA). Kanamycin (KAN) was supplied by Astral Scientific  
64 (Australia), and ampicillin (AMP) was purchased from Gold Biotechnology (USA).

### 65 **Culture conditions, TCS exposure, and antibiotic-resistance determination**

66 *E. coli* K-12 stock from -80 °C was cultivated on LB agar [lysogeny broth: 5 g/L yeast extract  
67 (Difco), 10 g/L NaCl and 10 g/L tryptone (Difco)] at 37 °C for 24h to isolate a single isogenic  
68 strain. The isolate was grown in liquid LB for 12 h at 37 °C to reach a bacterial cell concentration  
69 of 10<sup>8</sup>-10<sup>9</sup> CFU/mL. For TCS exposure experiments, 50 µL of the cell suspension was inoculated  
70 into 4.95 mL fresh liquid LB supplemented with different concentrations of TCS (0, 0.02, 0.2, and  
71 2 mg/L, respectively) at 37 °C, shaken at 150 rpm, in triplicate. Every 24 h, 50 µL of the cell

72 mixture was transferred to another 5 mL tube containing 4.95 mL fresh, liquid LB with respective  
73 concentrations of TCS. This was repeated for 30 subculture cycles. At the end of the treatment,  
74 100  $\mu$ L of each cell culture was plated on LB agar containing respective antibiotics at near MIC  
75 (Table S1) at 37 °C for 48 h, and then the number of colonies were counted. The colonies grown  
76 on the antibiotic-supplemented plates were considered to have resistance to the corresponding  
77 antibiotic. The mutation frequency was calculated by dividing the number of antibiotic-resistant  
78 colonies by the total bacterial count, which was enumerated from the LB agar without antibiotics.

### 79 **Determination of minimum inhibitory concentrations (MICs)**

80 Following 30 days 0.2 mg/L TCS exposure, and subsequent cultivation on antibiotic selection  
81 plates (0.2T-AMX, 0.2T-CHL and 0.2T-TET), 5~8 antibiotic-resistant colonies were randomly  
82 picked, and incubated at 37 °C for 12 h in 2 mL of liquid LB. Using the selected strains, MICs  
83 were determined for eight antibiotics, respectively, including AMX, AMP, LEX, CHL, KAN,  
84 LVX, NOR and TET using an initial bacterial cell concentration of  $10^6$  CFU/mL. Then, 15  $\mu$ L of  
85 this cell suspension was added to each well containing 135  $\mu$ L of serially, 2-fold diluted antibiotics  
86 in a fresh 96-well plate, followed by incubation at 37 °C for 24 h. The optical density (OD<sub>600nm</sub>)  
87 was measured using a plate reader Infinite® 200 PRO (Tecan, Swiss). Each strain was tested in  
88 triplicate including sterilized PBS as a blank control. Fold changes in antibiotic-MICs were also  
89 calculated by dividing MICs of all treated mutants by the MIC of the wild-type *E. coli* (Figure 1C).

### 90 **Hereditary stability test**

91 Antibiotic-resistant mutants (0.2T-AMX, 0.2T-CHL and 0.2T-TET) used for MIC profiling were  
92 cultivated in 5 mL liquid LB without antibiotics or TCS at 37 °C and 150 rpm. After 24 h, 1% of  
93 each liquid cell culture was transferred to fresh 5 mL treatment-free liquid LB and incubated under  
94 the same conditions. After five cycles, the MICs of eight antibiotics were tested respectively using

95 the same method described previously, and the fold changes in MICs were determined. Each  
96 sample was tested in triplicate. MIC fold changes were determined for the cell cultures at day 0  
97 and day 5 of incubation (Figure 1D, E and F).

### 98 **Live and dead cells percentages**

99 The inhibitory effect of TCS on *E. coli* K-12 were investigated by staining with BacLight™  
100 Bacterial Viability Kit (Invitrogen, USA). The LIVE/DEAD cell ratio of TCS-treated (0, 0.02, 0.2,  
101 and 2 mg/L TCS for 2 h) *E. coli* was then dual stained with propidium iodide (final concentration:  
102 30  $\mu$ M) and SYTO 9 (final concentration: 5  $\mu$ M) in the dark at room temperature for 30 mins. The  
103 fluorescence was quantified by applying 500  $\mu$ L ( $10^6$  CFU/mL) of the stained samples to a  
104 CYTOFLEX flow cytometer (BD Biosciences, USA) with 488 nm excitation, and emissions were  
105 measured above 630 nm for red (PI) fluorescence and at 520 nm for green (SYTO 9) fluorescence.  
106 Untreated and heat-treated (2 h at 80 °C) cells were used as controls for intact and damaged cells,  
107 respectively.

### 108 **Detection of Reactive Oxygen Species (ROS)**

109 To explore whether oxidative stress plays a role in promoting TCS-induced mutation, intracellular  
110 ROS formation was determined using the dye 2',7'-dichlorofluorescein diacetate (DCF-DA,  
111 Abcam, UK), which can be oxidized by ROS into fluorescent compound, 2', 7'-  
112 dichlorofluorescein (DCF), and measured with an Accuri C6 cytometer (BD Biosciences, USA).  
113 Briefly, bacterial cell suspensions (approximately  $10^6$ - $10^7$  CFU/mL) were incubated with DCF-  
114 DA (at a final concentration of 20  $\mu$ M) for 30 min at 37 °C, shaken at 100 rpm in the dark. The  
115 bacterial cells were then directly treated with TCS (0.02, 0.2, and 2 mg/L) for 2 h at 37 °C, shaken  
116 at 100 rpm in the dark. A tert-butyl hydrogen peroxide (TBHP)-treated sample (50  $\mu$ M) was used  
117 as a positive control, and three non-TCS-treated samples as negative controls. The samples were

118 then scanned by an Accuri C6 cytometer, and the DCF fluorescence (excitation at 488 nm/emission  
119 at 525 nm) was measured to deduce the ROS production level (Figure 1H). The relative ROS  
120 production level after dosage with 0.2 mg/L TCS for 2 h was determined for wild-type *E. coli* and  
121 0.2T-AMX-, 0.2T-CHL- and 0.2T-TET-resistant strains which had been originally incubated with  
122 0.2 mg/L TCS, 30 days (Figure 1I).

### 123 **DNA extraction, Illumina sequencing and data processing**

124 MIC-profiled colonies from 0.2T-AMX-, 0.2T-CHL- and 0.2T-TET-resistant strains, and  
125 untreated *E. coli* K-12 were cultured in duplicate in 10 mL liquid LB at 37 °C for 16 h (shaken at  
126 150 rpm) to reach  $10^7\sim 10^8$  CFU/mL. Bacteria were then collected by 10 min centrifugation at 8000  
127  $\times$  g, and genomic DNA was extracted using FastDNA™ SPIN Kit for Soil (MP, USA) following  
128 the manufacturer's instructions. The NexteraXT DNA Sample preparation kit (Illumina, USA) was  
129 used to prepare a whole-genome shotgun library which was sequenced by AGRF (Brisbane,  
130 Australia) using a MiSeq instrument (Illumina, USA) with 150 bp paired-end sequencing, to a  
131 coverage of over 100-fold. A reference genome for *E. coli* strain K-12 was obtained from Genbank  
132 (Accession NC000913.3). The Illumina paired-end raw data was trimmed by Trimmomatic  
133 version 0.36<sup>14</sup> to remove adapter and other illumine-specific sequences from the reads. After this,  
134 only properly paired reads were kept for further downstream analysis. These high read-depth data  
135 sets were aligned back to reference to study small variants e.g. Single nucleotide polymorphism  
136 (SNP), short indel (insertion or deletion), using BreSeq version 0.29.0.<sup>15</sup> The allele frequency  
137 information was then extracted, and highly divergent loci were subjected to further analysis.  
138 Throughout the process, data visualization tools such as BRIG<sup>16</sup> and Mauve<sup>17</sup> were utilized for  
139 comprehensive comparisons and graphical plots.

### 140 **RNA extraction, genome-wide RNA sequencing and transcriptomic analysis**

141 MIC-profiled 0.2T-AMX-, 0.2T-CHL- and 0.2T-TET-resistant mutants as well as the wild-type  
142 strain *E. coli* K-12 were cultured in triplicate in 10 mL liquid LB with 0.2 mg/L TCS at 37 °C for  
143 8 h, shaken at 150 rpm. Bacterial cells were then collected by 10 min centrifugation at  $8000 \times g$ .  
144 Total RNA was extracted from the mutants using the QIAGEN miRNeasy Mini Kit (QIAGEN,  
145 Germany) manufacturer's protocol with one extra bead-beating step to completely lyse the  
146 bacterial cells. RNA was treated with TURBO™ DNase (Ambion, USA) according to the  
147 manufacturer's protocol, and integrity was confirmed via electrophoresis on a 2% agarose gel.  
148 Strand specific cDNA library construction and HiSeq 2500 (Illumina, USA) Illumina paired-end  
149 sequencing was conducted by Macrogen (Seoul, Korea). The NGS QC toolkit (version 2.3.3) was  
150 used to treat the raw sequence reads to trim the 3'-end residual primers and adaptors, following  
151 the removal of the ambiguous characters in the reads. Then, the sequence reads consisting of at  
152 least 85% bases were progressively trimmed at the 3'-ends until a quality value  $\geq 20$  were kept.  
153 Downstream analyses were performed using the generated clean reads of no shorter than 75 bp.  
154 The clean reads of each sequenced strains were aligned to the *E. coli* reference genome  
155 (NC\_000913) using SeqAlto (version 0.5). The strand-specific coverage for each gene was  
156 calculated using Cufflinks (version 2.2.1), and to evaluate the differential t in triplicate bacterial  
157 cell cultures. CummeRbund package in R (<http://compbio.mit.edu/cummeRbund/>) were used to  
158 conduct the statistical analyses and visualization. Gene transcription was calculated as fragments  
159 per kilobase of a gene per million mapped reads (FPKM), a normalized value generated from the  
160 frequency of detection and the length of a given gene. Changes in expression values were  
161 calculated between wild-type *E. coli* control, 0.2 mg/L TCS-treated wild-type *E. coli*, and 0.2 mg/L  
162 TCS-treated 0.2T-AMX-, 0.2T-CHL- and 0.2T-TET mutants by determining the  $\log_2$  fold change  
163 (LFC) of the averaged FPKM values of five, triplicate experiments. Genes with LFC of  $\leq -2$  and



164  $\geq 2$ , false discovery rate (FDR) of less than 0.05 and q value of less than 0.05, were labeled genes  
165 with highly differentially expression. Genes with LFC of  $< 2$  but  $\geq 1$ , and  $\leq -2$  but  $> -1$  with q value  
166 of less than 0.05, and FDR of less than 0.05 were labeled moderately differentially expressed  
167 genes. Annotation of the differentially gene expressions was conducted by the online-curated  
168 Pathway Tools Genome Database, PseudoCyc (<http://www.pseudomonas.com>). The program  
169 Circos was applied to visualize the RPKM values for each gene amongst different samples.<sup>18</sup>

### 170 **Statistical Analysis**

171 SPSS Statistics 24.0 (SPSS, Chicago, USA) was used for all data analysis. Significant differences  
172 were assessed using Independent-samples *t*-test. A value of  $p < 0.05$  was considered significant,  
173 and a value of  $p < 0.01$  was considered very significant.

### 174 **Data availability**

175 All DNA sequencing data have been deposited with the National Center for Biotechnology  
176 Information (NCBI), and this is accessible through the SRA series (accession no. SRP124796).  
177 All RNA sequencing data have been deposited to the NCBI Gene Expression Omnibus, and this  
178 is accessible through the GEO series (accession no. GSE107048).

179

## 180 **3. RESULTS AND DISCUSSION**

### 181 **TCS treatment induces heritable multi-antibiotic resistance**

182 We exposed wild-type *E. coli* to TCS with different concentrations (0, 0.02, 0.2 and 2 mg/L).  
183 Enumeration of antibiotic-resistant strains was carried out every 5 days by plating on LB agar  
184 supplemented with antibiotics (Table S1). The number of resistant colonies grown on plates  
185 containing different antibiotics was divided with total bacteria number to obtain the “mutation  
186 frequency”. The spontaneous mutation frequencies against eight types of antibiotics were

187 established using the wide-type strain (non TCS-treated), which varied from  $10^{-7}$  to  $10^{-8}$  for  
188 different antibiotics. Then the mutation frequencies of TCS treated samples were compared with  
189 control and the increase of mutation frequency were calculated by the normalization to the  
190 spontaneous mutation frequency (Figure 1B). No significant increase in mutation frequency was  
191 detected until day 30, when 0.2 mg/L TCS significantly increased mutation frequencies against  
192 levofloxacin (LVX,  $4.2 \pm 1.1$  times), amoxicillin (AMX,  $60.8 \pm 5.6$  times), tetracycline (TET,  $76.0$   
193  $\pm 15.2$  times) and chloramphenicol (CHL,  $122.6 \pm 17.3$  times), than that of the spontaneously  
194 resistant mutants without TCS treatment ( $*p < 0.05$ ,  $**p < 0.01$ , Independent-samples *t*-test). In  
195 contrast, exposure to TCS at 0.02 and 2 mg/L did not lead to any significant increase in antibiotic-  
196 resistant mutants compared to the control without exposure to TCS (Figure 1B and Table S2).

197  
198 To further confirm the development of antibiotic resistance, at least five colonies were randomly  
199 selected of each AMX- (labelled 0.2T-AMX), CHL- (labelled 0.2T-CHL) and TET- (labelled  
200 0.2T-TET) resistant mutants induced by 30-day TCS treatment at 0.2 mg/L. The MICs of eight  
201 clinically important antibiotics were determined for the selected antibiotic-resistant mutants  
202 (Figure 1A). The 0.2T-AMX mutants expressed 6.7-fold increased MIC against the three beta-  
203 lactam antibiotics, ampicillin (AMP), cephalexin (LEX) and AMX. The 0.2T-CHL and 0.2T-TET  
204 mutants also showed increased MICs to multiple antibiotics of different categories (Figure 1C).  
205 Three types of resistant strains were scanned of antibiotic MICs on day 0 and day 5 cultivation  
206 (approximately 360 generations given a doubling time of 20 min) in the absence of TCS or  
207 antibiotics. All the antibiotic-resistant mutants on day 5 maintained similar antibiotic MICs  
208 compared to day 0 (Figure 1D-F), indicating genetically hereditary stability, and a possible  
209 mutagenic effect of TCS.

210

### 211 **TCS enhances generation of reactive oxygen species (ROS)**

212 Previously, antibiotics were found to epigenetically generate antibiotic-resistant mutations via  
213 ROS stress response systems that damage DNA and the subsequent DNA repair system.<sup>19</sup> Thus,  
214 we tested ROS generation and cell viability using flow cytometry, to verify whether TCS can  
215 induce oxidative stress in *E. coli*. We found that exposure to TCS at 0.2 and 2 mg/L for 2 h induced  
216 inhibitory effects on *E. coli* growth, the total cell concentration reduced from  $8.86 \times 10^6 \pm 7.79 \times$   
217  $10^5$  cell/mL (0 mg/L TCS) to  $8.17 \times 10^5 \pm 3.03 \times 10^4$  cell/mL (0.2 mg/L TCS) and  $5.06 \times 10^5 \pm$   
218  $2.60 \times 10^4$  cell/mL (2 mg TCS) (Figure 1G). Meanwhile, TCS exposure increased dead cell number  
219 from  $1.33 \times 10^3 \pm 4.71 \times 10^2$  cell/mL (0 mg/L TCS) to  $1.66 \times 10^3 \pm 4.71 \times 10^2$  cell/mL (0.2 mg/L  
220 TCS) and  $5.00 \times 10^3 \pm 8.16 \times 10^2$  cell/mL (2 mg TCS). More importantly, both 0.2 and 2 mg/L  
221 TCS treatments significantly increased generation of ROS for  $5.00 \pm 1.24$  folds and  $9.37 \pm 0.78$   
222 folds, respectively (Figure 1H). In contrast, TCS treatment at 0.02 mg/L did not trigger significant  
223 ROS generation (Figure 1H) or cell inhibition (Figure 1G), which is consistent with a previous  
224 report(10) that TCS at 0.03 mg/L did not induce antibiotic resistance. Noticeably, although TCS  
225 dosage of 2 mg/L increased the ROS production, it did not increase mutation frequency (Figure  
226 1B), likely because this near-MIC dosage of TCS reduced the frequency of accumulating  
227 mutations by decreasing the cell proliferation rate. These results indicate that there might be a  
228 threshold TCS concentration for the generation of antibiotic resistance. Moreover, TCS-induced  
229 mutants generated less ROS compared to wild-type *E. coli* (Figure 1I), suggesting mutants have  
230 developed resistance to TCS-induced oxidative stress.

231

### 232 **TCS triggers genetic mutations**

233 To reveal the genetic changes involved in TCS-induced antibiotic resistance, we conducted  
234 genome-wide DNA sequencing on three types (0.2T-AMX, 0.2T-CHL and 0.2T-TET) of  
235 replicated TCS-induced mutants ( $n = 6$ ) and wild-type *E. coli* ( $n = 2$ ) (Figure 2). Sequencing of 6  
236 antibiotic-resistant mutants generated after exposure to TCS at 0.2 mg/L revealed 14 genetic  
237 changes in 11 genes and 9 mutations in intergenic spacers compared with the untreated *E. coli*  
238 (Figure 2 and Tables S3). All sequenced mutants displayed the +A insertion in the *insB-1* gene as  
239 well as substitution mutations in the *fabI* gene. TCS inhibits bacterial fatty acid synthesis by  
240 binding enoyl reductase FabI which encoded by *fabI* gene,<sup>20</sup> therefore missense mutation in the  
241 *fabI* gene could reduce TCS efficacy by altering the structure of the target FabI protein.<sup>21</sup> In  
242 addition to these shared mutations, some strain-specific mutations were also identified. For  
243 example, the substitution mutations of *acrR* (L65R), *citC* (A346T) and *soxR* (R20S) genes were  
244 only identified in the 0.2T-CHL strains. For the 0.2T-TET strain, a  $\Delta 1$  bp frameshift in *insl-1*  
245 gene and a substitution mutation in *marR* gene (T72P) were unique compared to other strains.  
246 Lastly, the 0.2T-AMX strain were detected with genetic changes include the substitution  
247 mutations in *aaeB* (V311G) and *rpoD* genes (D445G), an insertion in *frdD* gene (345/360 nt) as  
248 well as an insertion in intergenic spacer between *rrlG* and *rrfG* genes (Figure 2C).

249

## 250 **TCS exposure regulates gene expression levels**

251 In parallel, molecular mechanisms responsible for TCS-induced antibiotic resistance were  
252 determined by transcriptional analysis. Whole genome Illumina RNA sequencing was conducted  
253 on three types of mutants ( $n = 9$ ) and wild-type *E. coli* ( $n = 3$ ) in response to 0.2 mg/L TCS  
254 exposure for 8 h. Compared with non-treated wild-type *E. coli* ( $n = 3$ ), acute exposure to TCS ( $t =$   
255 8 h) lead to representative changes in transcription among mutants and wild-type *E. coli* (Figure

256 S1A and B). For wild-type *E. coli*, acute TCS exposure enhanced the expression of SIM network  
257 genes, such as *umuC* and *yjfY* that encode for DNA repair, efflux system-coding genes *acrE*, *mdtE*,  
258 *acrF*, *mdtB*, *mdtC* and *yddA*, and metallo-beta-lactamase superfamily coding gene *yjcS* ( $p < 0.05$ ,  
259 Figure 3A, Tables S5, S6 and S7). In contrast, the expression of *ygiW*, *soxS* and *yhcN* genes that  
260 encode cellular antioxidants as well as membrane porin-encoding gene *ompX* were down-regulated  
261 (Figure 3A and Table S6 S7 and S8). These results suggest that at 0.2 mg/L TCS applies oxidative  
262 stress to *E. coli* while decreasing the expression of cellular antioxidant-encoding genes, which  
263 could then trigger the SIM response to DNA damage.

264  
265 In TCS-induced mutants, genes encoding cellular antioxidants significantly increased ( $p < 0.05$ )  
266 expression levels when exposed to TCS, compared to non TCS-treated wild-type (e.g., *sodA* and  
267 *yggX*, Table S8), and this may lead to reduced ROS generation compared to the untreated *E. coli*  
268 (Figure 1I). In contrast, the expression levels of SIM-network gene *argD* and membrane porin-  
269 encoding gene *phoE* were significantly decreased when treated with 0.2 mg/L TCS (Figure 3A,  
270 Tables S5 and S7).

271  
272 **TCS-induced mutations alter transcriptional response**  
273 TCS-induced genetic mutations may have caused increased antibiotic tolerance via regulating the  
274 expression of genes involved in antibiotic resistance (Figure 3A, Table S4 and S9). To illustrate,  
275 because the promoter of beta-lactamase-encoding gene *ampC* in *E. coli* K-12 overlaps the *frdD*  
276 gene region,<sup>22</sup> the *frdD* mutation detected in 0.2T-AMX mutants may have affected the *ampC*  
277 promoter strength,<sup>23</sup> thereby increasing the expression of *ampC* ( $\log_2$  fold change (LFC) = 5.4),  
278 leading to the increased tolerance to beta-lactam antibiotics<sup>24</sup> (Figure 1C, 2C, 3A and Table S7).

279 In 0.2T-CHL strains, mutation in the *acrR* gene might have caused impaired function of *acrAB*  
280 repressor AcrR,<sup>25</sup> resulting in increased transcription of the AcrAB multidrug efflux pump-coding  
281 genes *acrAB*.<sup>26</sup> Additionally, mutation in the *soxR* gene may have increased the expression of  
282 *soxS*,<sup>27</sup> resulting in an increase in efflux by up-regulating the *acrAB*.<sup>28</sup> Therefore, overexpressed  
283 AcrAB multidrug efflux pump is likely to contribute to multiple antibiotic resistance<sup>29</sup> (Figure 1C,  
284 2C and 3A). In 0.2T-TET mutants, mutation in the *marR* gene may have attenuated binding  
285 efficacy of the *marRAB* operon repressor MarR,<sup>25,30</sup> leading to the overexpression of *marAB* genes  
286 which regulate global multidrug resistance.<sup>31</sup> Consequently, MarAB may have initiated the  
287 expression of a cascade of antibiotic-resistance genes such as *acrAB*, *tolC*, *gadAB* and *yadGH*,<sup>32</sup>  
288 which may have increased antibiotic resistance by promoting the expression and strength of the  
289 AcrAB-TolC efflux pump system (Figure 1C, 2C, 3A and B, Table S9).

290

### 291 **Possible mechanisms of antibiotic resistance induced by TCS exposure**

292 In summary, our results suggest that at sub-MIC, TCS confers multiple antibiotic resistance in *E.*  
293 *coli* via ROS-induced mutation (Figure 4). Exposure to sub-MIC TCS (e.g. 0.2 mg/L) likely causes  
294 acute ROS generation in *E. coli*, and this oxidative stress triggers stress-induced mutagenesis that  
295 causes mutations in key genes such as *frdD*, *marR*, *acrR* and *soxR*. Those mutations result in either  
296 the overexpression of adjacent genes (*ampC* in the case of *frdD* mutation and *soxS* in the case of  
297 *soxR* mutation), or the enhanced expression of repressed genes (*marAB* and *acrAB*) caused by the  
298 mutations in repressor genes (*marR* and *acrR*). Consequently, the enhanced expressions of beta-  
299 lactamase-coding gene *ampC* as well as local and global multidrug resistance regulator genes  
300 *acrAB*, *soxS* and *marAB*, may initiate the translation of beta-lactamase AmpC and multidrug efflux  
301 pumps AcrAB-TolC. Together with the reduced expression of porin-encoding gene *phoE* that

302 affects cell membrane permeability, TCS-induced mutants could express extraordinary heritable  
303 resistance to a broad range of antibiotics by decreasing antibiotics uptake and increasing antibiotics  
304 efflux plus antibiotic degradation.

305

306 Our findings suggest that non-antibiotic, antimicrobial chemical triclosan, at an environmentally  
307 relevant concentration, can induce multi-drug resistance with high hereditary stability.  
308 Considering the wide use of NAAM chemicals, and the prevalence of antibiotic-resistant bacteria,  
309 our study creates an imperative for a comprehensive analysis of the potential role of NAAM  
310 chemicals in triggering antibiotic resistance in microorganisms. To holistically evaluate the  
311 potential impact of NAAM chemical use on public health, a cohesive and rigorous understanding  
312 of the relationship between NAAM chemicals and global antibiotic resistance dissemination is  
313 critical.

314

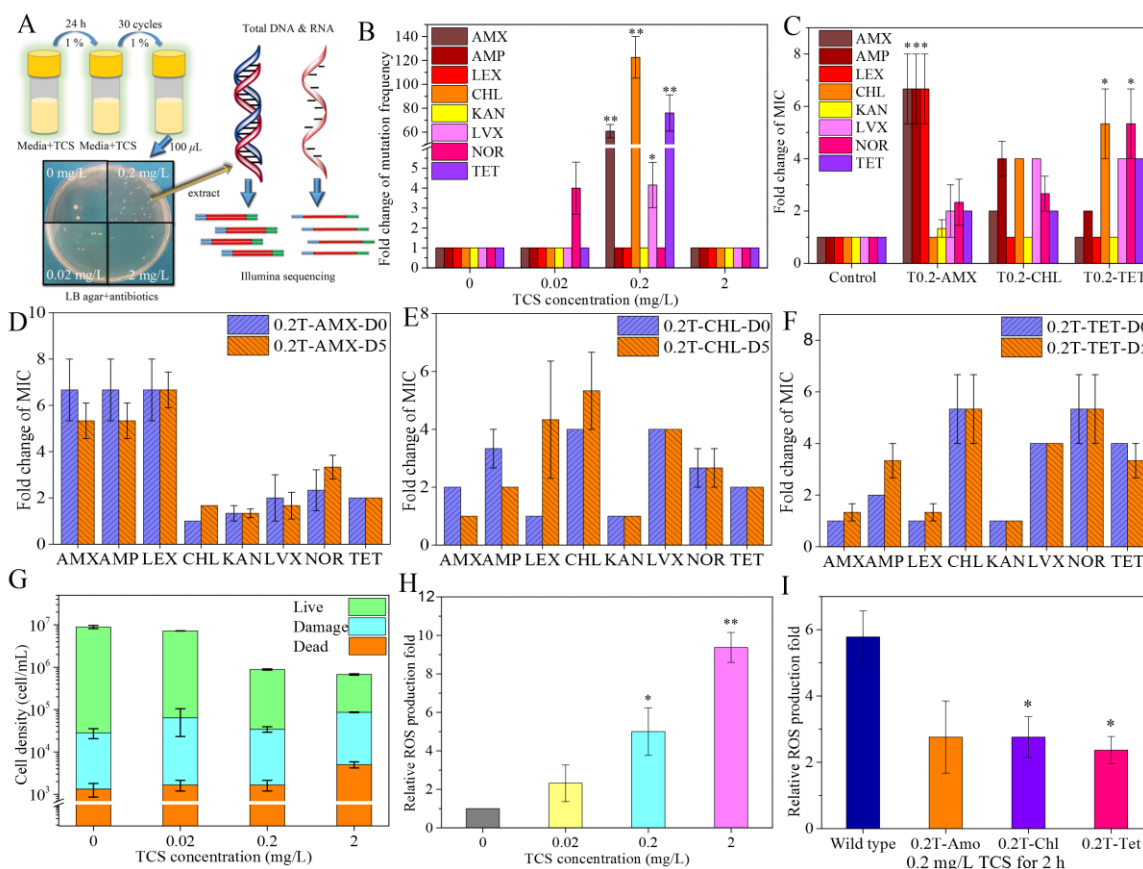

315  
 316 **Figure 1.** TCS caused reactive oxygen species (ROS) generation, and 30-day TCS treatment  
 317 induced heritable multi-antibiotic resistance. (A) Set-up of experiment with TCS treatment.  
 318 Every 24 h, 1% of TCS-treated *E. coli* culture was transferred into a fresh medium containing the  
 319 same concentration of TCS. After 30 cycles, antibiotic-resistant strains were isolated by plating  
 320 on LB agar supplemented with eight antibiotics, respectively (supplementary Table 1). Resistant  
 321 strains isolated in this way were randomly selected to profile the MIC of multiple antibiotics ( $n =$   
 322 8), followed by genome-wide DNA- and RNA sequencing to compare with wild-type *E. coli*. (B)  
 323 Fold changes in mutation frequencies for amoxicillin (AMX), ampicillin (AMP), cephalexin  
 324 (LEX), chloramphenicol (CHL), kanamycin (KAN), levofloxacin (LVX), norfloxacin (NOR)  
 325 and tetracycline (TET) after 30-day exposure to TCS at different concentrations, relative to  
 326 untreated *E. coli* (mean  $\pm$  s.e.m.,  $n \geq 3$ ), significance of difference with wild-type: \* $p < 0.05$ , \*\*



327  $p < 0.01$  (Independent-samples  $t$ -test). (C) MIC fold increases for eight antibiotics determined for  
328 AMX- (0.2T-AMX), CHL- (0.2T-CHL) and TET- (0.2T-TET) resistant strains (mean  $\pm$  s.e.m.,  $n$   
329  $\geq 5$ ). All resistant strains showed statistically significant ( $*p < 0.05$ ,  $**p < 0.01$ , Independent-  
330 samples  $t$ -test) increases in MICs for multiple antibiotics. Fold change of MICs of 0.2T-AMX  
331 (D), 0.2T-CHL (E) and 0.2T-TET (F) strains at day 0 (D0) and after 5 days (D5) cultivation in  
332 the absence of antibiotics or TCS (mean  $\pm$  s.e.m.,  $n \geq 3$ ). The cultivation did not cause any  
333 significant changes ( $p > 0.05$ ). (G) Concentration of viable cells (green), damaged cells (blue)  
334 and dead cells (orange) detected by flow cytometer after 2 h exposure to TCS (mean  $\pm$  s.e.m.,  $n =$   
335 3). (H) Relative ROS production by the wild-type *E. coli* after exposure to TCS for 2 h (mean  $\pm$   
336 s.e.m.,  $n = 3$ ), significance of difference with non-treated wild-type:  $*p < 0.05$ ,  $**p < 0.01$   
337 (Independent-samples  $t$ -test). (I) ROS production in wild-type *E. coli*, 0.2T-AMX, 0.2T-CHL  
338 and 0.2T-TET mutants following exposure to 0.2 mg/L of TCS for 2 h (mean  $\pm$  s.e.m.,  $n = 3$ ), as  
339 enumerated by the ROS-positive percentage of fluorescence detected by flow cytometer ( $*p <$   
340 0.05, Independent-samples  $t$ -test).

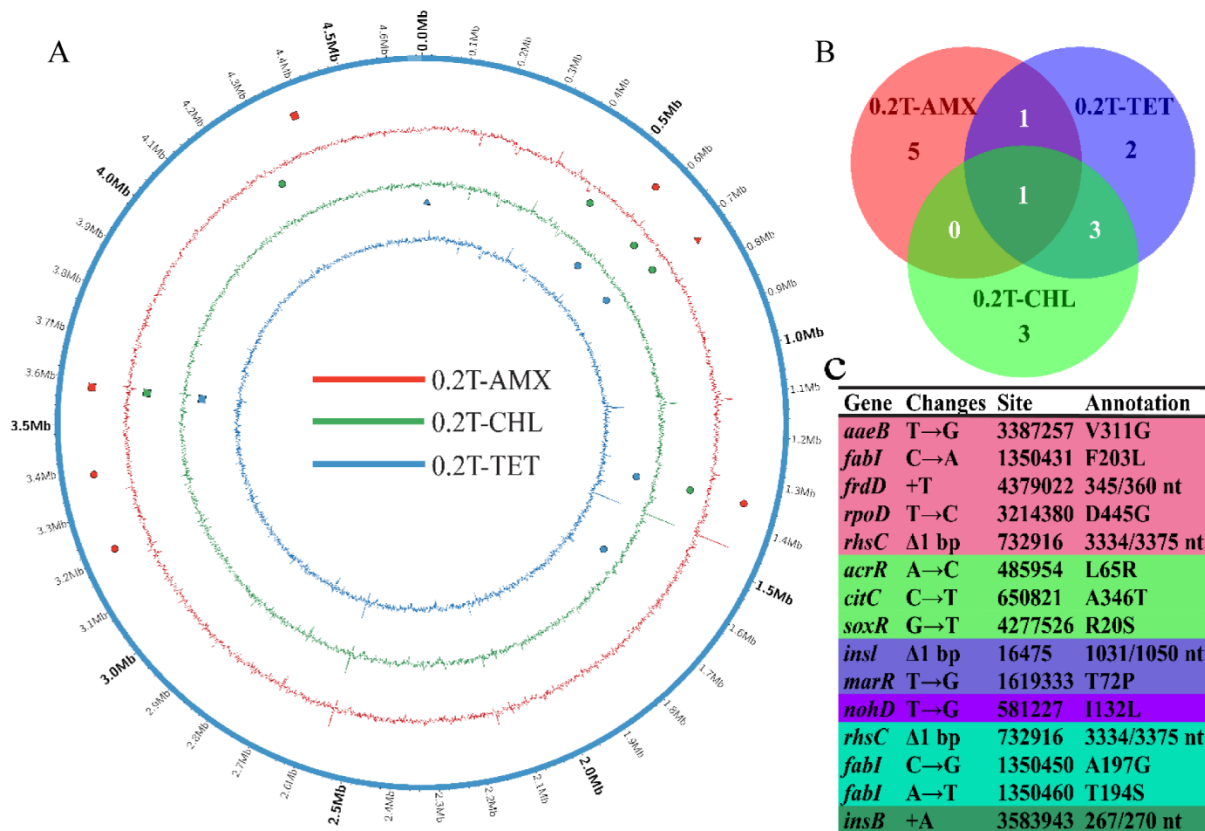

341  
 342 **Figure 2.** TCS-induced genetic mutations. (A) Genetic changes identified by Illumina whole  
 343 genomic analysis in three types of mutants ( $n = 6$ , from inside to outside: 0.2T-AMX, 0.2T-CHL  
 344 and 0.2T-TET) selected with exposure to 0.2 mg/L TCS for 30 days, compared with wild-type *E.*  
 345 *coli* ( $n = 2$ ). The outer circle represents the 4.63 Mb *E. coli* reference genome. ● represents  
 346 single nucleotide polymorphism, ■ represents a nucleotide insertion and ▲ represents a  
 347 nucleotide deletion at the corresponding sites of the genome. (B) Venn diagram showing the  
 348 number of gene mutations in 0.2T-AMX (red), 0.2T-CHL (green) and 0.2T-TET (blue) mutants  
 349 compared with wild-type control. (C) Table showing the list of gene mutations in (B) identified  
 350 with different color.

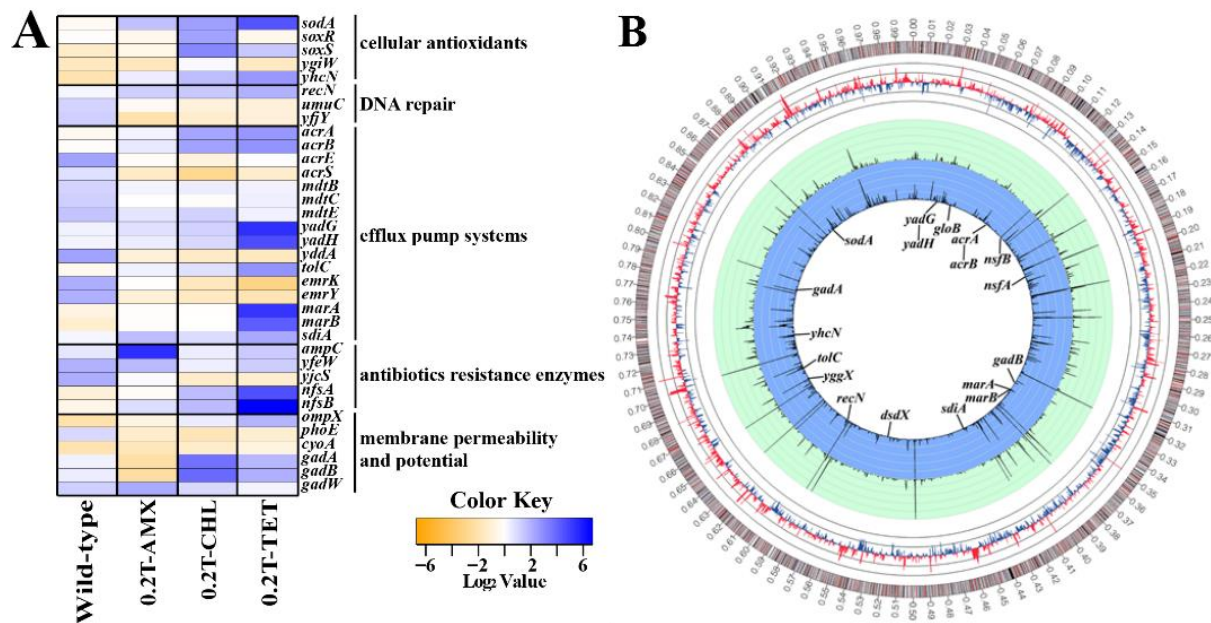

351  
 352 **Figure 3.** Gene expression with TCS exposure. (A) Differential expression of selected genes  
 353 among wild-type ( $n = 1$ ) and TCS-induced mutants ( $n = 8$ ) which are influenced by TCS  
 354 exposure. Differences in the levels of expression of stress-response and antibiotic resistance-  
 355 related genes measured under control and 0.2 mg/L ( $t = 8$ h) TCS conditions are presented. Each  
 356 gene is represented by the  $\log_2$  of the fold change (i.e., RPKM TCS treated samples/untreated  
 357 control ratio values). Orange represents the down-regulation of gene expression ( $\log_2 < -2$ ),  
 358 while blue represents up-regulation of mRNA expression ( $\log_2 > 2$ ). (B) Global analysis of  
 359 transcript levels in wild-type *E. coli* ( $n = 3$ ) and 0.2T-TET mutants ( $n = 2$ ) by RNA-seq. From  
 360 inside out, the blue circle corresponds to the expression of each gene (represented as RPKM  
 361 values) in 0.2T-TET mutants exposed to TCS-0.2 mg/L, while the green circle corresponds to  
 362 wild-type *E. coli* grown without TCS. In both of the colored circles, thin circular lines represent  
 363 an RPKM value of 1,000, with a limit at 5,000. The third line from the inside in the five gray  
 364 circles represents the expression baseline of non-treated wild-type *E. coli*, and each thin gray  
 365 circular line represent 4-fold changes (or  $\log_2 = 2$ ) in expression of each gene. The outermost  
 366 circle represents the full strain *E. coli* K-12 genome.

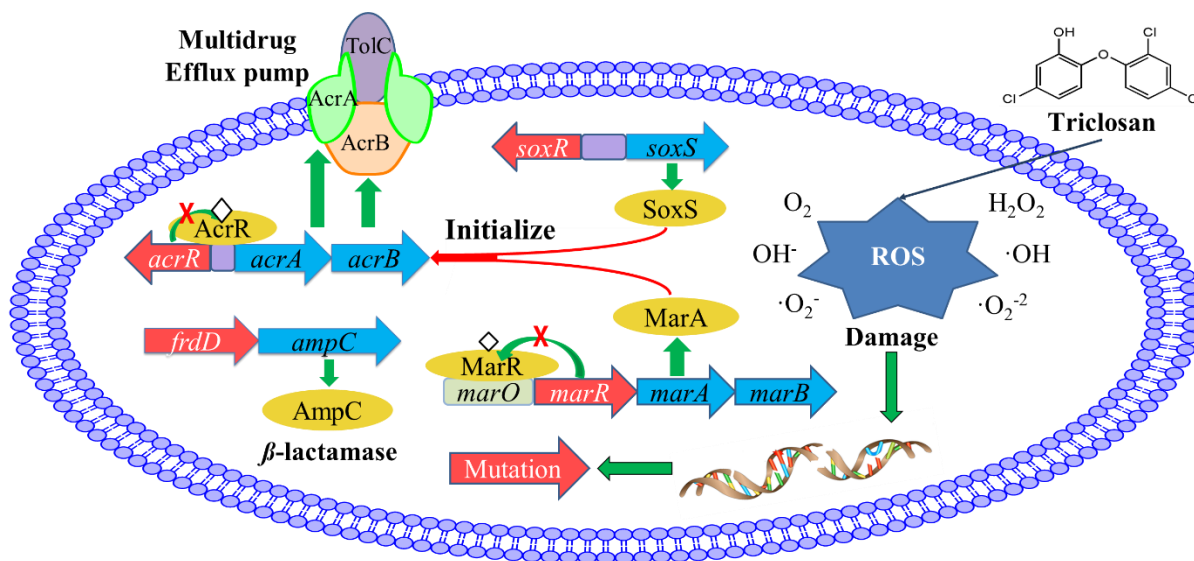

367

368 **Figure 4.** Proposed mechanism of TCS-induced antibiotic resistance. Oxidative stress generated  
369 by TCS can induce genetic mutations. Consequently, the genetic mutations lead to the  
370 overexpression of beta-lactamase-coding gene or global and local multidrug regulator genes that  
371 initiate the expression of multidrug efflux pumps. Red arrow represents gene mutations, blue  
372 arrow indicates up-regulated gene, yellow ellipse represents a protein, and white diamond means  
373 a loss of protein function.

374

375 **Notes**

376 The authors declare no competing financial interest.

377 **ACKNOWLEDGMENTS**

378 We acknowledge the Australian Research Council for funding support through Future  
379 Fellowship (FT170100196). Jianhua Guo would like to thank the support by UQ Foundation  
380 Research Excellence Awards. We are grateful to Dr. Eloise Larsen for reviewing and editing the  
381 manuscript. We thank Dr. Michael Nefedov of The University of Queensland for assistance with  
382 the BD FACSAria™ II flow cytometer and data analysis. This work was performed in part at the  
383 Queensland node of the Australian National Fabrication Facility.

384 **ABBREVIATIONS**

385 NAAM, non-antibiotic, anti-microbial; TCS, triclosan; MIC, minimum inhibition concentration;  
386 ROS, Reactive Oxidative Species; SIM, stress-induced mutagenesis; AMX, amoxicillin; LEX,  
387 cephalexin; TET, tetracycline; CHL, chloramphenicol; LVX, levofloxacin; NOR, norfloxacin;  
388 KAN, Kanamycin; AMP, ampicillin; DCF-DA, 2',7'-dichlorofluorescein diacetate; TBHP, N,N-  
389 dialkylanilines with tert-butyl hydroperoxide; SNP, single nucleotide polymorphism; FDR, false  
390 discovery rate; FPKM, fragments per kilobase of a gene per million mapped reads; LFC, log<sub>2</sub>  
391 fold change;

392

393 **REFERENCES**

- 394 1. Taubes, G., The bacteria fight back. *Science* **2008**, *321*, (5887), 356-361.
- 395 2. Review on Antimicrobial Resistance, From “*Tackling a Crisis for the Health and Wealth*  
396 *of Nations.*” **2015**, <http://amr-review.org/sites/default/files/Report-52.15.pdf>
- 397 3. Marti, E.; Variatza, E.; Balcazar, J. L., The role of aquatic ecosystems as reservoirs of  
398 antibiotic resistance. *Trends Microbiol.* **2014**, *22*, (1), 36-41.
- 399 4. Dann, A. B.; Hontela, A., Triclosan: environmental exposure, toxicity and mechanisms of  
400 action. *J. Appl. Toxicol.* **2011**, *31*, (4), 285-311.
- 401 5. Singer, H.; Muller, S.; Tixier, C.; Pillonel, L., Triclosan: occurrence and fate of a widely  
402 used biocide in the aquatic environment: field measurements in wastewater treatment plants,  
403 surface waters, and lake sediments. *Environ. Sci. Technol.* **2002**, *36*, (23), 4998-5004.
- 404 6. Kumar, K. S.; Priya, S. M.; Peck, A. M.; Sajwan, K. S., Mass loadings of triclosan and  
405 triclocarbon from four wastewater treatment plants to three rivers and landfill in Savannah,  
406 Georgia, USA. *Arch. Environ. Contam. Toxicol.* **2010**, *58*, (2), 275-285.
- 407 7. Chalew, T. E.; Halden, R. U., Environmental exposure of aquatic and terrestrial biota to  
408 triclosan and triclocarban. *J. Am. Water Works Assoc.* **2009**, *45*, (1), 4-13.
- 409 8. Giuliano, C. A.; Rybak, M. J., Efficacy of triclosan as an antimicrobial hand soap and its  
410 potential impact on antimicrobial resistance: a focused review. *Pharmacotherapy* **2015**, *35*, (3),  
411 328-36.

- 412 9. Cookson, B. D.; Farrelly, H.; Stapleton, P.; Garvey, R. P. J.; Price, M. R., Transferable  
413 resistance to triclosan in MRSA. *The Lancet* **1991**, *337*, (8756), 1548-1549.
- 414 10. Webber, M. A.; Buckner, M. M. C.; Redgrave, L. S.; Ifill, G.; Mitchenall, L. A.; Webb, C.;  
415 Iddles, R.; Maxwell, A.; Piddock, L. J. V., Quinolone-resistant gyrase mutants demonstrate  
416 decreased susceptibility to triclosan. *J. Antimicrob. Chemother.* **2017**, *72*, (10), 2755-2763.
- 417 11. Randall, L. P.; Cooles, S. W.; Piddock, L. J. V.; Woodward, M. J., Effect of triclosan or a  
418 phenolic farm disinfectant on the selection of antibiotic-resistant *Salmonella enterica*. *J.*  
419 *Antimicrob. Chemother.* **2004**, *54*, (3), 621-627.
- 420 12. Mavri, A.; Smole Možina, S., Development of antimicrobial resistance in *Campylobacter*  
421 *jejuni* and *Campylobacter coli* adapted to biocides. *Int. J. Food Microbiol.* **2013**, *160*, (3), 304-  
422 312.
- 423 13. USFDA, From “*Safety and Effectiveness of Consumer Antiseptics; Topical Antimicrobial*  
424 *Drug Products for Over-the-Counter Human Use.*” **2016**,  
425 [https://www.fda.gov/downloads/AboutFDA/ReportsManualsForms/Reports/EconomicAnalyses/  
426 UCM510753.pdf](https://www.fda.gov/downloads/AboutFDA/ReportsManualsForms/Reports/EconomicAnalyses/UCM510753.pdf)
- 427 14. Bolger, A. M.; Lohse, M.; Usadel, B., Trimmomatic: a flexible trimmer for Illumina  
428 sequence data. *Bioinformatics* **2014**, *30*, (15), 2114-2120.
- 429 15. Deatherage, D. E.; Barrick, J. E., Identification of mutations in laboratory-evolved  
430 microbes from next-generation sequencing data using *breseq*. *Methods Mol. Biol.* **2014**, 165-188.

- 431 16. Alikhan, N.-F.; Petty, N. K.; Zakour, N. L. B.; Beatson, S. A., BLAST Ring Image  
432 Generator (BRIG): simple prokaryote genome comparisons. *BMC genomics* **2011**, *12*, (1), 402.
- 433 17. Darling, A. E.; Mau, B.; Perna, N. T., progressiveMauve: multiple genome alignment with  
434 gene gain, loss and rearrangement. *PLoS One* **2010**, *5*, (6), e11147.
- 435 18. Krzywinski, M. I.; Schein, J. E.; Birol, I.; Connors, J.; Gascoyne, R.; Horsman, D.; Jones,  
436 S. J.; Marra, M. A., Circos: An information aesthetic for comparative genomics. *Genome Research*  
437 **2009**.
- 438 19. Dwyer, D. J.; Kohanski, M. A.; Collins, J. J., Role of reactive oxygen species in antibiotic  
439 action and resistance. *Curr. Opin. Microbiol.* **2009**, *12*, (5), 8.
- 440 20. Heath, R. J.; Rubin, J. R.; Holland, D. R.; Zhang, E.; Snow, M. E.; Rock, C. O., Mechanism  
441 of triclosan inhibition of bacterial fatty acid synthesis. *J. Biol. Chem.* **1999**, *274*, (16), 11110-  
442 11114.
- 443 21. Sivaraman, S.; Zwahlen, J.; Bell, A. F.; Hedstrom, L.; Tonge, P. J., Structure – activity  
444 studies of the inhibition of FabI, the Enoyl Reductase from *Escherichia coli*, by Triclosan: kinetic  
445 analysis of mutant FabIs. *Biochemistry* **2003**, *42*.
- 446 22. Grundstrom, T.; Jaurin, B., Overlap between *ampC* and *frd* operons on the *Escherichia coli*  
447 chromosome. *Proc. Natl. Acad. Sci. USA* **1982**, *79*, (4), 1111-5.
- 448 23. Tracz, D. M.; Boyd, D. A.; Bryden, L.; Hizon, R.; Giercke, S.; Van Caesele, P.; Mulvey,  
449 M. R., Increase in *ampC* promoter strength due to mutations and deletion of the attenuator in a



- 450 clinical isolate of cefoxitin-resistant *Escherichia coli* as determined by RT-PCR. *J. Antimicrob.*  
451 *Chemother.* **2005**, *55*, (5), 768-772.
- 452 24. Jacoby, G. A., AmpC beta-lactamases. *Clin. Microbiol. Rev.* **2009**, *22*, (1), 161-82, Table  
453 of Contents.
- 454 25. Lázár, V.; Nagy, I.; Spohn, R.; Csörgő, B.; Györkei, Á.; Nyerges, Á.; Horváth, B.; Vörös,  
455 A.; Busa-Fekete, R.; Hrtyan, M.; Bogos, B.; Méhi, O.; Fekete, G.; Szappanos, B.; Kégl, B.; Papp,  
456 B.; Pál, C., Genome-wide analysis captures the determinants of the antibiotic cross-resistance  
457 interaction network. *Nat. Commun.* **2014**, *5*, 4352.
- 458 26. Wang, H.; Dzink-Fox, J. L.; Chen, M.; Levy, S. B., genetic characterization of highly  
459 fluoroquinolone-resistant clinical *Escherichia coli* strains from China: role of *acrR* mutations.  
460 *Antimicrob. Agents. Chemother.* **2001**, *45*, (5), 1515-1521.
- 461 27. Koutsolioutsou, A.; Pena-Llopis, S.; Demple, B., Constitutive *soxR* mutations contribute  
462 to multiple-antibiotic resistance in clinical *Escherichia coli* isolates. *Antimicrob. Agents.*  
463 *Chemother.* **2005**, *49*, (7), 2746-52.
- 464 28. White, D. G.; Goldman, J. D.; Demple, B.; Levy, S. B., Role of the *acrAB* locus in organic  
465 solvent tolerance mediated by expression of *marA*, *soxS*, or *robA* in *Escherichia coli*. *J. Bacteriol.*  
466 **1997**, *179*, (19), 6122-6.
- 467 29. Ma, D.; Cook, D. N.; Alberti, M.; Pon, N. G.; Nikaido, H.; Hearst, J. E., Genes *acrA* and  
468 *acrB* encode a stress-induced efflux system of *Escherichia coli*. *Mol. Microbiol.* **1995**, *16*, (1), 45-  
469 55.

470 30. Alekshun, M. N.; Levy, S. B., The *mar* regulon: multiple resistance to antibiotics and other  
471 toxic chemicals. *Trends Microbiol.* **1999**, 7, (10), 410-3.

472 31. Sulavik, M. C.; Gambino, L. F.; Miller, P. F., The MarR repressor of the multiple antibiotic  
473 resistance (*mar*) operon in *Escherichia coli*: prototypic member of a family of bacterial regulatory  
474 proteins involved in sensing phenolic compounds. *Molecular Medicine.* **1995**, 1, (4), 436-446.

475 32. Alekshun, M. N.; Kim, Y. S.; Levy, S. B., Mutational analysis of MarR, the negative  
476 regulator of *marRAB* expression in *Escherichia coli*, suggests the presence of two regions required  
477 for DNA binding. *Mol. Microbiol.* **2000**, 35, (6), 1394-404.

## 478 Table of Contents

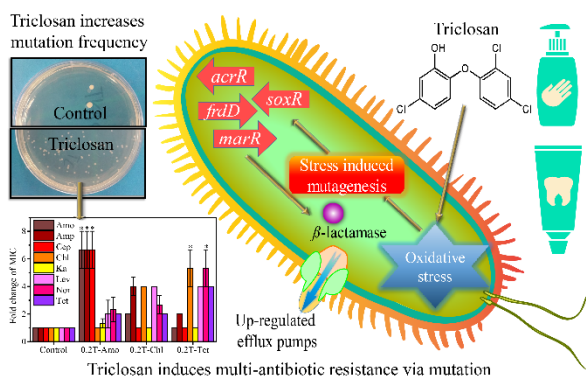

479
